# Supplementary material for: Comparative Mitogenome Analyses Uncover Mitogenome Features and Phylogenetic Implications of the Parrotfishes (Perciformes: Scaridae)
Source: Biology (Basel). 2023 Mar 7;12(3):410. doi: 10.3390/biology12030410 (PMC10044791; doi:10.3390/biology12030410)
Supplement: Supplementary file 1 [file biology-12-00410-s001.zip › biology-2221904-supplementary.xlsx]

## Sheet: Table S1
Table S1: General features of the parrotfish mitogenomes
	Calotomus carolinus								Calotomus_japonicus								Bolbometopon_muricatum								Cetoscarus bicolor								Chlorurus sordidus								Hipposcarus longiceps								Scarus chameleon
Feature	Start	Stop	Length/bp	Intergenic nucleotide	Start codon	Stop codon	Anti-codon	Strand	Start	Stop	Length/bp	Intergenic nucleotide	Start codon	Stop codon	Anti-codon	Strand	Start	Stop	Length/bp	Intergenic nucleotide	Start codon	Stop codon	Anti-codon	Strand	Start	Stop	Length/bp	Intergenic nucleotide	Start codon	Stop codon	Anti-codon	Strand	Start	Stop	Length/bp	Intergenic nucleotide	Start codon	Stop codon	Anti-codon	Strand	Start	Stop	Length/bp	Intergenic nucleotide	Start codon	Stop codon	Anti-codon	Strand	Start
tRNAPhe	1	69	69	0			GAA	+	1	68	68	0			GAA	+	1	68	68	0			GAA	+	1	68	68	0			GAA	+	1	68	68	0			GAA	+	1	68	68	0			GAA	+	1
12S-rRNA	70	1020	951	0				+	69	1021	953	0				+	69	1013	945	0				+	69	1012	944	0				+	69	1022	954	0				+	69	1012	944	10				+	69
tRNAVal	1021	1093	73	0			TAC	+	1022	1094	73	0			TAC	+	1014	1085	72	0			TAC	+	1013	1086	74	0			TAC	+	1023	1093	71	0			TAC	+	1023	1092	70	0			TAC	+	1020
16S-rRNA	1094	2782	1689	0				+	1095	2785	1691	0				+	1086	2767	1682	0				+	1087	2772	1686	0				+	1094	2778	1685	76				+	1093	2770	1678	0				+	1091
tRNALeu (UAA)	2783	2855	73	0			TAA	+	2786	2858	73	0			TAA	+	2768	2841	74	3			TAA	+	2773	2846	74	3			TAA	+	2779	2852	74	2			TAA	+	2771	2844	74	2			TAA	+	2775
ND1	2856	3830	975	7	ATG	TAA		+	2859	3833	975	7	ATG	TAA		+	2845	3816	972	2	ATG	TAA		+	2850	3821	972	2	ATG	TAA		+	2855	3826	972	2	ATG	TAA		+	2847	3818	972	2	ATG	TAA		+	2851
tRNAIle	3838	3907	70	10			GAT	+	3841	3910	70	10			GAT	+	3819	3888	70	10			GAT	+	3824	3893	70	11			GAT	+	3829	3898	70	7			GAT	+	3821	3890	70	7			GAT	+	3825
tRNAMet	3918	3986	69	6			TTG	+	3921	3990	70	6			TTG	+	3899	3968	70	6			TTG	+	3905	3974	70	6			TTG	+	3906	3975	70	9			TTG	+	3898	3967	70	8			TTG	+	3900
tRNAGln	3993	4063	71	68			CAT	-	3997	4067	71	27			CAT	-	3975	4045	71	66			CAT	-	3981	4051	71	64			CAT	-	3985	4055	71	66			CAT	-	3976	4046	71	66			CAT	-	3976
ND2	4132	5176	1045	0	ATG	TAG		+	4095	5181	1087	0	ATG	TAG		+	4112	5158	1047	9	ATG	TAG		+	4116	5160	1045	0	ATG	TAG		+	4122	5166	1045	0	ATG	TAA		+	4113	5157	1045	0	ATG	TAG		+	4073
tRNATrp	5177	5247	71	4			TCA	+	5182	5250	69	4			TCA	+	5168	5237	70	2			TCA	+	5161	5229	69	8			TCA	+	5167	5237	71	2			TCA	+	5158	5227	70	2			TCA	+	5157
tRNAAla	5252	5322	71	5			TGC	-	5255	5325	71	6			TGC	-	5240	5308	69	3			TGC	-	5238	5306	69	3			TGC	-	5240	5308	69	4			TGC	-	5230	5298	69	4			TGC	-	5230
tRNAAsn	5328	5400	73	41			GTT	-	5332	5404	73	38			GTT	-	5312	5384	73	40			GTT	-	5310	5382	73	36			GTT	-	5313	5385	73	43			GTT	-	5303	5375	73	40			GTT	-	5302
tRNACys	5442	5507	66	9			GCA	-	5443	5508	66	9			GCA	-	5425	5491	67	0			GCA	-	5419	5485	67	0			GCA	-	5429	5496	68	0			GCA	-	5416	5482	67	0			GCA	-	5415
tRNATyr	5517	5586	70	1			GTA	-	5518	5588	71	1			GTA	-	5492	5562	71	1			GTA	-	5486	5556	71	1			GTA	-	5497	5566	70	1			GTA	-	5483	5551	69	1			GTA	-	5484
COI	5588	7138	1551	0	GTG	TAA		+	5590	7140	1551	0	GTG	TAA		+	5564	7114	1551	0	GTG	TAA		+	5558	7108	1551	0	GTG	TAA		+	5568	7127	1560	-9	GTG	TAA		+	5553	7103	1551	0	GTG	TAA		+	5555
tRNASer (UGA)	7139	7209	71	3			TGA	-	7141	7211	71	3			TGA	-	7115	7185	71	3			TGA	-	7109	7179	71	3			TGA	-	7119	7189	71	4			TGA	-	7104	7174	71	3			TGA	-	7106
tRNAAsp	7213	7283	71	4			GTC	+	7215	7286	72	4			GTC	+	7189	7261	73	7			GTC	+	7183	7255	73	7			GTC	+	7194	7263	70	6			GTC	+	7178	7250	73	7			GTC	+	7181
COII	7288	7978	691	0	ATG	T		+	7291	7981	691	0	ATG	T		+	7269	7959	691	0	ATG	T		+	7263	7953	691	0	ATG	T		+	7270	7960	691	0	ATG	T		+	7258	7948	691	0	ATG	T		+	7260
tRNALys	7979	8052	74	1			TTT	+	7982	8055	74	1			TTT	+	7960	8033	74	1			TTT	+	7954	8028	75	1			TTT	+	7961	8034	74	1			TTT	+	7949	8022	74	1			TTT	+	7951
ATPase 8	8054	8221	168	-16	ATG	TAG		+	8057	8224	168	-16	ATG	TAG		+	8035	8202	168	-10	ATG	TAG		+	8030	8197	168	-10	ATG	TAA		+	8036	8203	168	-10	ATG	TAA		+	8024	8191	168	-10	ATG	TAA		+	8026
ATPase 6	8206	8894	689	0	CTG	TA		+	8209	8897	689	0	CTG	TA		+	8193	8875	683	0	CTG	TA		+	8188	8870	683	0	ATG	TA		+	8194	8876	683	0	ATG	TA		+	8182	8864	683	0	ATG	TA		+	8184
COIII	8895	9679	785	0	ATG	TAA		+	8898	9682	785	0	ATG	TAA		+	8876	9660	785	0	ATG	TAA		+	8871	9655	785	0	ATG	TAA		+	8877	9661	785	0	ATG	TAA		+	8865	9649	785	0	ATG	TAA		+	8867
tRNAGly	9680	9750	71	1			TCC	+	9683	9753	71	1			TCC	+	9661	9731	71	1			TCC	+	9656	9726	71	1			TCC	+	9662	9733	72	1			TCC	+	9650	9720	71	1			TCC	+	9652
ND3	9752	10103	352	0	ATA	TAG		+	9755	10106	352	0	ATA	TAG		+	9733	10084	352	0	ATA	TAG		+	9728	10079	352	0	ATT	TAG		+	9735	10086	352	0	ATT	TAG		+	9722	10073	352	0	ATT	TAG		+	9724
tRNAArg	10104	10172	69	0			TCG	+	10107	10176	70	0			TCG	+	10085	10153	69	0			TCG	+	10080	10148	69	0			TCG	+	10087	10155	69	0			TCG	+	10074	10142	69	0			TCG	+	10076
ND4L	10173	10469	297	-7	ATG	TAA		+	10177	10473	297	-7	ATG	TAA		+	10154	10450	297	-7	ATG	TAA		+	10149	10445	297	-7	ATG	TAA		+	10156	10452	297	-7	ATG	TAA		+	10143	10439	297	-7	ATG	TAA		+	10145
ND4	10463	11843	1381	0	ATG	T		+	10467	11847	1381	0	ATG	T		+	10444	11824	1381	0	ATG	T		+	10439	11819	1381	0	ATG	T		+	10446	11825	1380	2	ATG	TA		+	10433	11813	1381	0	ATG	T		+	10435
tRNAHis	11844	11912	69	2			GTG	+	11848	11916	69	1			GTG	+	11825	11893	69	1			GTG	+	11820	11888	69	0			GTG	+	11828	11896	69	0			GTG	+	11814	11882	69	1			GTG	+	11817
tRNASer (GCU)	11915	11980	66	32			GCT	+	11918	11984	67	38			GCT	+	11895	11963	69	13			GCT	+	11889	11957	69	9			GCT	+	11897	11968	72	7			GCT	+	11884	11952	69	12			GCT	+	11887
tRNALeu (UAG)	12013	12084	72	4			TAG	+	12023	12094	72	4			TAG	+	11977	12048	72	0			TAG	+	11967	12038	72	0			TAG	+	11976	12047	72	0			TAG	+	11965	12036	72	0			TAG	+	11967
ND5	12089	13930	1842	-4	ATG	TAA		+	12099	13940	1842	-4	ATG	TAA		+	12049	13887	1839	-4	ATG	TAA		+	12039	13877	1839	-4	ATG	TAA		+	12048	13886	1839	-4	ATG	TAA		+	12037	13875	1839	-4	ATG	TAG		+	12039
ND6	13927	14448	522	1	ATG	TAA		-	13937	14458	522	1	ATG	TAA		-	13884	14405	522	0	ATG	TAA		-	13874	14395	522	0	ATG	TAG		-	13883	14404	522	0	ATG	TAG		-	13872	14378	507	36	ATG	TAG		-	13874
tRNAGlu	14450	14522	73	64			TTC	-	14460	14532	73	69			TTC	-	14406	14474	69	5			TTC	-	14396	14464	69	5			TTC	-	14405	14473	69	5			TTC	-	14415	14485	71	5			TTC	-	14396
Cyt b	14587	15727	1141	0	ATG	T		+	14602	15742	1141	0	ATG	T		+	14480	15620	1141	0	ATG	T		+	14470	15610	1141	0	ATG	T		+	14479	15619	1141	0	ATG	T		+	14491	15631	1141	0	ATG	T		+	14470
tRNAThr	15728	15799	72	0			TGT	+	15743	15814	72	0			TGT	+	15621	15692	72	-1			TGT	+	15611	15682	72	-1			TGT	+	15620	15690	71	-1			TGT	+	15632	15702	71	-1			TGT	+	15611
tRNAPro	15800	15872	73	0			TGG	-	15815	15886	72	0			TGG	-	15692	15762	71	0			TGG	-	15682	15752	71	0			TGG	-	15690	15761	72	0			TGG	-	15702	15572	-129	0			TGG	-	15681
D-loop	15873	17114	1242					+	15887	17199	1313					+	15763	16788	1026					+	15753	16711	959					+	15762	16681	920					+	15573	16688	1116					+	15752
[truncated: 71 more columns]

## Sheet: Table S2
Table S2: AT content of the parrotfish mitogenomes.
Species	Mitogenome	PCGs	PCGs-1st	PCGs-2nd	PCGs-3rd	ND1	ND2	COI	COII	ATP8	ATP6	COIII	ND3	ND4L	ND4	ND5	ND6	CYTB	rRNAs	tRNAs	CR
Bolbometopon muricatum KY235362	56.3915	55.9007	54.4357	58.3465	55.2113	52.7778	53.9637	56.2218	59.3343	59.5238	56.4327	54.5223	56.6952	55.2189	55.105	57.4769	56.5134	56.9676	54.5316	56.3426	66.5692
Bolbometopon muricatum NC033901	56.3915	55.9007	54.4357	58.3465	55.2113	52.7778	53.9637	56.2218	59.3343	59.5238	56.4327	54.5223	56.6952	55.2189	55.105	57.4769	56.5134	56.9676	54.5316	56.3426	66.5692
Calotomus carolinus D105398	56.1295	55.912	54.3666	58.4317	55.2204	54.0513	55.7784	56.931	56.5407	57.7381	55.8781	54.9618	55.8405	54.2088	57.0601	57.0575	54.023	55.3024	54.0152	57.1795	60.1449
Calotomus japonicus AP017568	56.0847	55.9821	54.1044	57.6711	56.4271	54.5641	54.2584	56.4152	57.1635	56.5476	55.7329	56.9427	55.8405	54.8822	56.8429	56.949	55.364	55.7406	53.177	57.5096	59.3298
Calotomus japonicus NC035427	56.0847	55.9821	54.1044	57.6711	56.4271	54.5641	54.2584	56.4152	57.1635	56.5476	55.7329	56.9427	55.8405	54.8822	56.8429	56.949	55.364	55.7406	53.177	57.5096	59.3298
Cetoscarus bicolor D105397	53.6653	52.7244	53.2161	54.765	50.5119	50.823	51.1939	52.6757	54.5058	57.7381	53.655	53.0534	55.8405	48.1481	50.8327	53.6705	56.1303	53.7248	53.1939	55.9409	61.4181
Chlorurus sordidus AP006567	53.474	52.8173	52.9814	54.438	51.3393	50.4115	51.3876	53.2602	53.6903	57.7381	52.7086	51.8471	55.8405	50.5051	52.3188	54.1055	51.9157	54.6889	53.202	54.3115	60.4348
Hipposcarus longiceps D105396	53.9757	53.4297	52.8564	54.9528	52.7778	51.1317	52.149	53.7073	54.3605	54.1667	53.655	53.5623	53.5613	50.8418	53.4395	53.888	56.5378	54.6889	52.9635	54.9613	62.4454
Scarus chameleon D105392	53.8752	53.3579	52.7311	55.6577	52.0347	52.2634	52.34	54.352	53.9244	55.3571	53.8012	53.4351	56.9801	52.1886	52.6087	54.4861	52.2989	52.8484	53.1309	54.3353	61.8063
Scarus dimidiatus D105390	53.562	52.84	52.5998	54.555	51.7196	50.6173	52.0535	52.9336	53.343	55.9524	52.3392	51.145	55.5556	49.8316	53.1884	55.4105	52.8736	52.5855	53.1689	54.9133	60.3261
Scarus forsteni FJ619271	53.7143	52.9665	52.9674	54.7913	51.4571	51.4403	52.4402	52.9336	54.2692	55.9524	52.924	52.1019	54.1311	51.8519	51.8841	54.4861	52.8736	54.0754	53.6243	54.6915	61.1534
Scarus forsteni NC011928	53.7143	52.9665	52.9674	54.7913	51.4571	51.4403	52.4402	52.9336	54.2692	55.9524	52.924	52.1019	54.1311	51.8519	51.8841	54.4861	52.8736	54.0754	53.6243	54.6915	61.1534
Scarus frenatus 48a	53.1323	52.4487	52.481	54.4619	50.7349	51.1317	51.8625	52.2244	53.6903	55.9524	53.3626	51.9084	52.7066	49.4949	51.2319	54.1599	53.8314	52.8484	52.9189	54.3059	59.632
Scarus ghobban FJ449707	53.544	52.8348	52.7574	54.6863	51.4046	51.9547	51.5789	52.2888	53.5456	54.7619	54.0936	52.1019	54.1311	51.8519	51.8116	54.6493	52.682	53.9001	53.3738	54.7619	60.917
Scarus ghobban NC011599	53.544	52.8348	52.7574	54.6863	51.4046	51.9547	51.5789	52.2888	53.5456	54.7619	54.0936	52.1019	54.1311	51.8519	51.8116	54.6493	52.682	53.9001	53.3738	54.7619	60.917
Scarus globiceps D105393	53.0328	52.5239	52.7836	54.3712	50.7745	51.5432	49.7612	52.9336	53.9244	53.5714	53.2164	52.1628	53.2764	50.5051	52.3188	53.888	51.1494	54.3383	52.8832	54.6564	61.5217
Scarus niger 49a	53.2209	52.5415	52.9149	54.24	50.8007	51.2346	51.5759	52.2244	53.7791	54.7619	53.9474	51.9084	54.416	49.8316	52.2464	53.9967	52.2989	52.8484	52.8474	55.0417	59.1565
Scarus oviceps D105389	53.2615	52.5175	52.191	54.1186	51.574	50.823	51.5759	52.0309	54.0698	52.9762	52.4854	51.145	54.416	51.1785	53.4058	54.2208	52.8736	52.3225	52.9947	54.172	60.8932
Scarus prasiognathos 50a	53.7521	52.8787	53.0585	54.6194	51.3123	51.4403	51.767	52.6757	53.6903	54.7619	53.8012	52.1628	56.4103	50.5051	52.1014	54.3774	52.2989	54.0754	53.4319	55.4271	61.9718
Scarus quoyi 51a	53.6248	52.9753	53.2686	54.7769	51.2336	51.5432	50.8118	52.9981	54.1245	54.1667	53.0702	52.4173	54.416	52.5253	52.4638	53.888	55.1724	54.6012	52.959	54.4929	61.9565
Scarus rivulatus D105391	53.3002	52.5064	52.7836	54.4762	50.617	51.5432	49.8567	52.8046	53.9244	52.9762	52.4854	52.2901	53.8462	49.8316	52.4638	53.7249	51.5326	54.6012	52.9211	54.8491	61.4379
Scarus rubroviolaceus FJ227899	53.5639	52.9665	52.4947	54.9751	51.7721	51.5432	51.4833	52.9981	54.5586	54.7619	52.7778	52.9936	53.2764	51.1785	53.1159	54.323	53.6398	53.1989	53.4496	54.2471	60.0434
Scarus rubroviolaceus NC011343	53.5639	52.9665	52.4947	54.9751	51.7721	51.5432	51.4833	52.9981	54.5586	54.7619	52.7778	52.9936	53.2764	51.1785	53.1159	54.323	53.6398	53.1989	53.4496	54.2471	60.0434
Scarus schlegeli FJ595020	53.2244	52.6154	52.3634	54.9751	50.827	52.1605	51.2919	53.127	54.848	57.7381	51.9006	52.1019	55.8405	51.5152	51.3768	53.1811	50.7663	53.9877	53.1286	54.5338	58.4783
Scarus schlegeli NC011936	53.2244	52.6154	52.3634	54.9751	50.827	52.1605	51.2919	53.127	54.848	57.7381	51.9006	52.1019	55.8405	51.5152	51.3768	53.1811	50.7663	53.9877	53.1286	54.5338	58.4783

## Sheet: Table S3
Table S3: AT skew of the parrotfish mitogenomes
Species	Mitogenome	PCGs	PCGs-1st	PCGs-2nd	PCGs-3rd	ND1	ND2	COI	COII	ATP8	ATP6	COIII	ND3	ND4L	ND4	ND5	ND6	CYTB	rRNAs	tRNAs	CR
Bolbometopon muricatum KY235362	0.0353861	-0.0651389	-0.0935391	-0.133603	0.0375654	-0.0643275	0.019469	-0.110092	0.0146341	0.06	-0.0880829	-0.0373832	-0.20603	-0.0853659	-0.0065703	-0.000946074	-0.40339	-0.116923	0.23324	0.0217143	0.0951684
Bolbometopon muricatum NC033901	0.0353861	-0.0651389	-0.0935391	-0.133603	0.0375654	-0.0643275	0.019469	-0.110092	0.0146341	0.06	-0.0880829	-0.0373832	-0.20603	-0.0853659	-0.0065703	-0.000946074	-0.40339	-0.116923	0.23324	0.0217143	0.0951684
Calotomus carolinus D105398	-0.00291485	-0.0813607	-0.136517	-0.144524	0.0422803	-0.0815939	0.0547945	-0.0917327	-0.00257069	0.134021	-0.106494	-0.0509259	-0.112245	-0.204969	-0.0507614	-0.0865842	-0.35461	-0.137876	0.183731	0.0224215	-0.0736278
Calotomus japonicus AP017568	-0.0203193	-0.100047	-0.136209	-0.170532	0.0079033	-0.105263	-0.0546737	-0.106286	0.0177215	0.0947368	-0.119792	-0.064877	-0.0816327	-0.214724	-0.0878981	-0.0981888	-0.307958	-0.138365	0.189189	0.0290179	-0.132221
Calotomus japonicus NC035427	-0.0203193	-0.100047	-0.136209	-0.170532	0.0079033	-0.105263	-0.0546737	-0.106286	0.0177215	0.0947368	-0.119792	-0.064877	-0.0816327	-0.214724	-0.0878981	-0.0981888	-0.307958	-0.138365	0.189189	0.0290179	-0.132221
Cetoscarus bicolor D105397	0.0490633	-0.0417707	-0.0863345	-0.121764	0.0956341	-0.0404858	0.0447761	-0.111383	0.0293333	0.0721649	-0.0572207	-0.00719425	-0.173469	-0.048951	-0.014245	0.0618034	-0.392491	-0.0766721	0.239457	0.021814	0.0254669
Chlorurus sordidus AP006567	0.0286996	-0.0611499	-0.0907288	-0.154848	0.0700767	-0.0693878	-0.0242086	-0.0812121	0.0188679	-0.0103093	-0.0888889	-0.012285	-0.153061	-0.12	-0.0360111	0.0130653	-0.424354	-0.0737179	0.2151	0.007109	0.0215827
Hipposcarus longiceps D105396	0.0401865	-0.0437777	-0.0956867	-0.113972	0.0834161	-0.0422535	0.043956	-0.0732293	0.0213904	0.032967	-0.0463215	-0.0213777	-0.0744681	-0.0860927	-0.00271003	0.00100908	-0.34202	-0.0929487	0.223816	-0.00117233	0.020979
Scarus chameleon D105392	0.0208217	-0.0664692	-0.0886454	-0.151887	0.0514632	-0.0787402	0.00729927	-0.088968	-0.0242588	0.0752688	-0.0652174	-0.0619048	-0.18	-0.16129	-0.030303	0.00798403	-0.369963	-0.0978441	0.222857	0.0070922	-0.0105634
Scarus dimidiatus D105390	0.0382893	-0.0486792	-0.091363	-0.131858	0.0862944	-0.0406504	0.0348624	-0.0718636	-0.013624	0.106383	-0.0614525	-0.00497512	-0.220513	-0.135135	-0.0027248	0.0245339	-0.384058	-0.103333	0.223412	0.0105263	0.0234234
Scarus forsteni FJ619271	0.0407412	-0.0492129	-0.0827962	-0.13081	0.0744898	-0.036	0.0109489	-0.0645554	0.00266667	0.0851064	-0.0662983	-0.0268949	-0.2	-0.142857	-0.0111732	0.0219561	-0.405797	-0.0729335	0.227176	0.0246769	0.0213523
Scarus forsteni NC011928	0.0407412	-0.0492129	-0.0827962	-0.13081	0.0744898	-0.036	0.0109489	-0.0645554	0.00266667	0.0851064	-0.0662983	-0.0268949	-0.2	-0.142857	-0.0111732	0.0219561	-0.405797	-0.0729335	0.227176	0.0246769	0.0213523
Scarus frenatus 48a	0.0454699	-0.0414993	-0.0765383	-0.127711	0.0905328	-0.0181087	0.0423573	-0.0716049	-0.00808625	0.0851064	-0.0684932	-0.0196078	-0.221622	-0.102041	0.00424328	0.0341365	-0.359431	-0.0845771	0.227794	0.0272189	0.0526316
Scarus ghobban FJ449707	0.042222	-0.0455149	-0.0781483	-0.136822	0.0878447	-0.029703	-0.00556586	-0.0752158	0.00540541	0.0652174	-0.0540541	-0.0366748	-0.189474	-0.0909091	0.00699301	0.0308458	-0.425455	-0.0536585	0.224432	0.0505288	0.00358423
Scarus ghobban NC011599	0.042222	-0.0455149	-0.0781483	-0.136822	0.0878447	-0.029703	-0.00556586	-0.0752158	0.00540541	0.0652174	-0.0540541	-0.0366748	-0.189474	-0.0909091	0.00699301	0.0308458	-0.425455	-0.0536585	0.224432	0.0340776	0.00358423
Scarus globiceps D105393	0.0280332	-0.0616747	-0.0935323	-0.141478	0.0610134	-0.0658683	0.00959693	-0.0694275	0.00808625	0.0666667	-0.0714286	-0.0585366	-0.144385	-0.16	-0.0166205	0.00100908	-0.393258	-0.112903	0.232425	0.00117509	0.0141343
Scarus niger 49a	0.0486182	-0.0419382	-0.0799007	-0.121007	0.0852713	0.0120482	0.0222222	-0.0666667	-0.0216216	0.0652174	-0.0514905	-0.0196078	-0.162304	-0.148649	-0.00693481	0.0251762	-0.428571	-0.0514096	0.234195	0.0268378	0.0356473
Scarus oviceps D105389	0.0438596	-0.0425923	-0.0769231	-0.131362	0.0885046	-0.0202429	0.0518519	-0.0805452	0	0.101124	-0.0584958	-0.0447761	-0.225131	-0.144737	0.0149254	0.0219561	-0.398551	-0.0519263	0.228898	0.021327	-0.0125224
Scarus prasiognathos 50a	0.0508475	-0.0376763	-0.0806531	-0.119654	0.0976982	-0.008	0.0369004	-0.0648715	-0.0134771	0.0869565	-0.0326087	-0.0146341	-0.171717	-0.08	0.00417246	0.038	-0.413919	-0.082658	0.233499	0.0104287	0.0314685
Scarus quoyi 51a	0.0280666	-0.0609675	-0.0931493	-0.135601	0.0563525	-0.0339321	0.0413534	-0.0900243	0	0.0769231	-0.0633609	-0.0436893	-0.120419	-0.179487	-0.0303867	-0.00302725	-0.375	-0.120385	0.230659	0.00588928	-0.00701754
Scarus rivulatus D105391	0.0277809	-0.0630329	-0.0955224	-0.142169	0.060166	-0.0658683	0.0153257	-0.0744811	0.00808625	0.0786517	-0.0640669	-0.0559611	-0.142857	-0.162162	-0.019337	-0.00404858	-0.39777	-0.117175	0.232975	0.00702576	0
Scarus rubroviolaceus FJ227899	0.0379407	-0.0505385	-0.0785393	-0.147087	0.0831643	-0.0339321	0.00371747	-0.0827251	-0.00795756	0.130435	-0.0637119	-0.0288462	-0.165775	-0.131579	-0.0150068	0.027027	-0.385714	-0.0807249	0.225532	0.0462633	0.0198915
Scarus rubroviolaceus NC011343	0.0379407	-0.0505385	-0.0785393	-0.147087	0.0831643	-0.0339321	0.00371747	-0.0827251	-0.00795756	0.130435	-0.0637119	-0.0288462	-0.165775	-0.131579	-0.0150068	0.027027	-0.385714	-0.0807249	0.225532	0.0462633	0.0198915
Scarus schlegeli FJ595020	0.036562	-0.0558799	-0.0942828	-0.135626	0.0723141	-0.0571992	0.0186567	-0.0752427	0.00791557	0.0927835	-0.0873239	-0.0366748	-0.163265	-0.0718954	-0.00705219	0.00408998	-0.456604	-0.0844156	0.213419	0.0234192	0.0520446
Scarus schlegeli NC011936	0.036562	-0.0558799	-0.0942828	-0.135626	0.0723141	-0.0571992	0.0186567	-0.0752427	0.00791557	0.0927835	-0.0873239	-0.0366748	-0.163265	-0.0718954	-0.00705219	0.00408998	-0.456604	-0.0844156	0.213419	0.0234192	0.0520446
