# Supplementary figures and images for: Comparative Mitogenome Analyses Uncover Mitogenome Features and Phylogenetic Implications of the Parrotfishes (Perciformes: Scaridae)
Source: MDPI journal article supplement (doi:10.3390/biology12030410), 2023-03-07

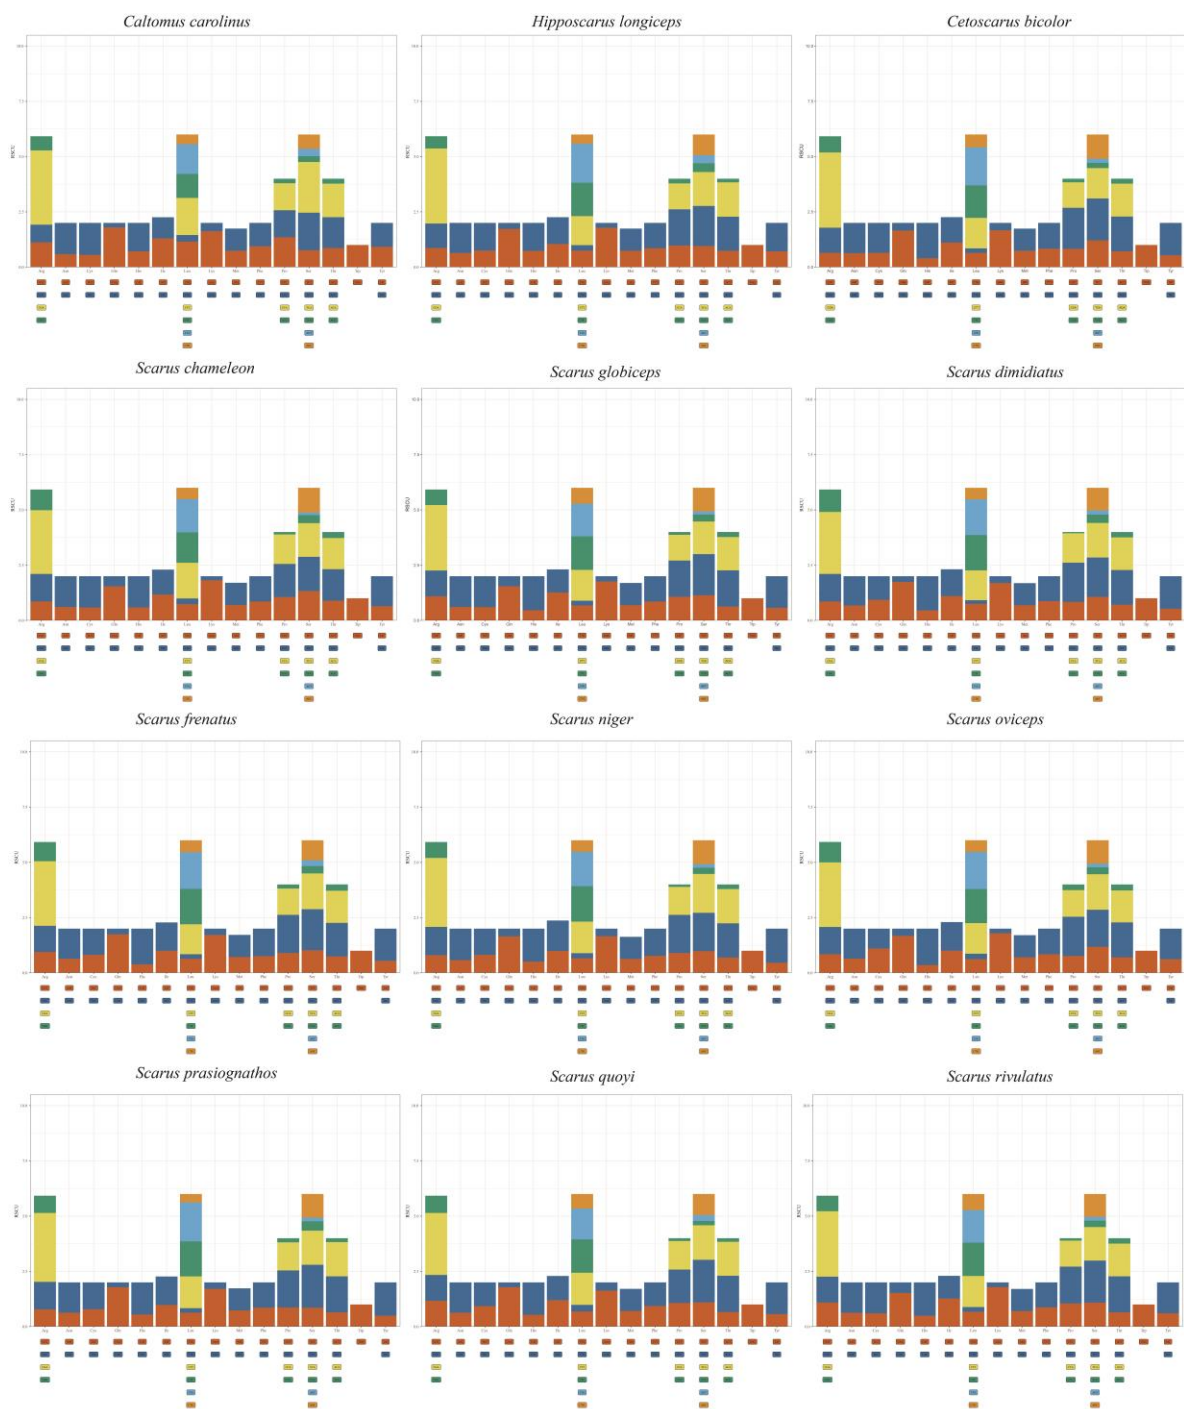

**Figure S1.** Relative synonymous codon usage (RSCU) of the 12 newly determined parrotfish species.

Supplement: s1 [file s1]
